# Supplementary material
Source: publisher figshare collection journal article supplement (https://frontiersin.figshare.com/ndownloader/files/30624051)
Supplement: Supplementary file [file 30624051]

## Supplementary Material

### 1 Supplementary Data

#### 1.1 Quantum Yield Measurement

The fluorescence quantum yields of the fluorophores were measured with a similar method to previously reported (Yang et al., 2017; Yang et al., 2018; Ma et al., 2020). The fluorescence spectra in the region of 900-1500 nm were measured by a spectrometer with a thermoelectrically cooled InGaAs detector (HORIBA Ihr320) under an 808 nm diode laser excitation (RMPC lasers, 180 mW). During emission measurements, one 850-nm short pass filter (Thorlabs) was used as the emission filter. The obtained emission spectra were further corrected by the detector sensitivity profile and the absorbance features of the filter. The fluorescence quantum yield was determined against the reference fluorophore **IR-FE** with a known quantum yield of 3.1% ( $\Phi_{st}$ ) in toluene, which was previously determined with **IR-26** of 0.050% as reference in dichloroethane. All samples were measured at 25 °C with optical density (OD) below 0.1 at 808 nm. The intensity read out from the InGaAs camera was a spectrally integrated total emission intensity in the 900-1400 nm region. Using the measured optical density (OD) at 808 nm and spectrally integrated fluorescence intensity (F), the quantum yield of the test sample can be calculated according to the following equation:

$$\Phi_x(\lambda) = \Phi_{st}(\lambda) \times \frac{F_x}{F_{st}} \times \frac{A_{st}(\lambda)}{A_x(\lambda)} \times \frac{\eta_x^2}{\eta_{st}^2} = \Phi_{st}(\lambda) \times \frac{F_x}{F_{st}} \times \frac{1 - 10^{-OD_{st}(\lambda)}}{1 - 10^{-OD_x(\lambda)}} \times \frac{\eta_x^2}{\eta_{st}^2}$$

$\Phi_{st}$  and  $F_{st}$  are data of the **IR-FE** standard,  $\Phi_x$  and  $F_x$  are data of the studied sample.  $\eta$  is the refractive index of solvent.

#### 1.2 Density Functional Theory Calculations

To reduce the computational cost, side chains on the benzene units are replaced by methoxy groups. The ground-state ( $S_0$ ) geometries of structure-simplified **BGM6**, **BGP6** and **BGO6** were firstly optimized at the B3LYP/6-31G(d) level (Lee et al., 1988; Heyd et al., 2003) and then re-optimized at the tuned- $\omega$ B97XD\*/6-31G(d) level. The corresponding range separation parameter ( $\omega$ , in Bohr<sup>-1</sup>) for each molecule was optimally tuned and listed in **Supplementary Table 1**. The excited-state ( $S_1$ ) geometries of these molecules were optimized using the time dependent (TD)-tuned- $\omega$ B97XD\*/6-31G(d) method (Runge and Gross, 1984). The HOMO and LUMO orbitals, absorption excitation

energies of these molecules were obtained at the TD-tuned-  $\omega$ B97XD\*/6-31G(d) level based on their optimized  $S_0$  geometries. The emission excitation energies of these molecules were calculated at the TD-tuned- $\omega$ B97XD\*/6-31G(d) level based on their optimized  $S_1$  geometries. The polarizable continuum model (PCM) (Tomasi et al., 2005) was employed to take into account the effects of the solvents. All the calculations were performed using the Gaussian 16 software.

### 1.3 Molecular Dynamic Simulations

For each molecule, the structure was optimized at the PCM(water)-B3LYP/6-311G\*\* level (Lee et al., 1988), and then restrained electrostatic potential (RESP) charges (Bayly et al., 1993) and the General Amber Force Field (GAFF) (Wang et al., 2004) were assigned for the optimized structure. To remove bad contacts before the simulation, 2000 steps of steepest descent followed by 8000 steps of conjugate gradient energy minimizations were carried out. All bonds with hydrogen atoms were fixed using the SHAKE algorithm (Ryckaert et al., 1977). The particle mesh Ewald method with an 8 Å cutoff in real space was used to calculate electrostatic interaction. A Langevin thermostat with a collision frequency of  $1.0 \text{ ps}^{-1}$  was used to regulate temperature. Isotropic pressure coupling with a relaxation time of 2 ps was used to maintain the pressure to 1 atm. All the MD simulations were performed by AMBER 18 program. The water molecules around the BBTD acceptor center in the effective contact distance ( $R = 6 \text{ Å}$ ) are displayed as the explicit water model. The initial structure of fluorophore was immersed in the center of a truncated octahedral box of TIP3P (Jorgensen et al., 1983) water molecules, and all of the PEG atoms were no less than 8 Å from the boundary of the water box. The relaxed structure was then gently heated from 0 to 300 K in 50 ps and equilibrated for 50 ps with weak restraints on each molecule, which was equilibrated for another 500 ps at constant pressure without restraint. Production simulations were extended to 140 ns for each molecule and trajectories were saved every 2 ps.

### 1.4 Centrifugal Filtration of Fluorophores

Considering the large aggregation of as-prepared fluorophores can be removed using centrifugal filter, fluorophores through filtration of 30, 50 and 100 kDa molecular weight cut-off (MWCO) are intravenously injected to investigate the effect of fluorophores aggregation on excretion behavior. The pass percentages of fluorophores through different filters are estimated with the optical density (OD) values at the peak and summarized in **Supplementary Table 3**. Selected time points from video-rate NIR-II imaging of mice in the supine position after tail vein injection of as-prepared, 30 kDa and 100

## 2 Synthetic Procedures and Characterization Data for the Molecular Fluorophores

**M1:** R1 = R4 = -OC<sub>6</sub>H<sub>12</sub>Br, R2 = R3 = H  
**M2:** R2 = R4 = -OC<sub>6</sub>H<sub>12</sub>Br, R1 = R3 = H  
**M3:** R2 = R3 = -OC<sub>6</sub>H<sub>12</sub>Br, R1 = R4 = H  
**M4:** R1 = R4 = -OC<sub>6</sub>H<sub>12</sub>Br, R2 = R3 = H  
**M5:** R2 = R4 = -OC<sub>6</sub>H<sub>12</sub>Br, R1 = R3 = H  
**M6:** R2 = R3 = -OC<sub>6</sub>H<sub>12</sub>Br, R1 = R4 = H  
**BGM6:** R1 = R4 = -OC<sub>6</sub>H<sub>12</sub>Br, R2 = R3 = H  
**BGP6:** R2 = R4 = -OC<sub>6</sub>H<sub>12</sub>Br, R1 = R3 = H  
**BGO6:** R2 = R3 = -OC<sub>6</sub>H<sub>12</sub>Br, R1 = R4 = H

**BGM6P:** R2 = R3 = H, R1 = R4 =   
**BGP6P:** R1 = R3 = H, R2 = R4 =   
**BGO6P:** R1 = R4 = H, R2 = R3 =

**Supplementary Scheme 1.** Synthetic routes of **BGM6**, **BGP6** and **BGO6** and their PEGylated compounds **BGM6P**, **BGP6P** and **BGO6P**.

The synthetic procedures of **M1-M3** were similar to the reported procedures in our previous work (Wan et al., 2018).

Compound **M1** (yield 53%).  $^1\text{H}$  NMR (500 MHz,  $\text{CDCl}_3$ ),  $\delta$  (ppm) 7.19 (t,  $J = 6.5$  Hz, 1H), 7.15 (d,  $J = 1.5$  Hz, 1H), 6.58 (d,  $J = 1.5$  Hz, 2H), 6.30 (d,  $J = 1.5$  Hz, 1H), 4.16 (m, 2H), 3.99 (m, 4H), 3.88 (m, 2H), 3.75 (m, 2H), 3.76 (m, 2H), 3.70 (m, 2H), 3.68 (m, 2H), 3.57 (m, 4H), 3.40 (m, 3H), 1.89 (m, 4H), 1.83 (m, 4H), 1.55 (m, 8H).  $^{13}\text{C}$  NMR (126 MHz,  $\text{CDCl}_3$ ),  $\delta$  (ppm) 157.35, 156.11, 133.25, 128.65, 121.22, 113.07, 105.46, 97.85, 72.08, 70.19, 70.81, 70.72, 69.94, 69.30, 68.98, 59.18, 33.99, 32.80, 29.07, 27.94, 25.46. HRMS (ESI) calcd for  $\text{C}_{29}\text{H}_{45}\text{O}_6\text{Br}^{\text{SI}}\text{BrS}$ , ( $[\text{M}+\text{H}]^+$ ) 681.1278, Found 681.1273.

Compound **M2** (yield 51%).  $^1\text{H}$  NMR (500 MHz,  $\text{CDCl}_3$ ),  $\delta$  (ppm) 7.19 (s, 1H), 7.14 (d,  $J = 1.5$  Hz, 1H), 6.87 (d,  $J = 1.5$  Hz, 1H), 6.77 (s, 1H), 6.27 (d,  $J = 1.5$  Hz, 1H), 4.15 (m, 2H), 3.99 (m, 4H), 3.95 (m, 2H), 3.92 (m, 2H), 3.87 (m, 2H), 3.76 (m, 2H), 3.70 (m, 2H), 3.68 (m, 2H), 3.57 (m, 2H), 3.45 (m, 3H), 3.40 (m, 2H), 1.91 (m, 6H), 1.80 (m, 2H), 1.55 (m, 8H).  $^{13}\text{C}$  NMR (126 MHz,  $\text{CDCl}_3$ ),  $\delta$  (ppm) 156.81, 153.15, 149.72, 138.12, 123.98, 117.12, 114.47, 114.11, 114.08, 98.32, 72.07, 70.93, 70.80, 70.72, 69.86, 69.47, 69.40, 68.53, 59.20, 34.01, 33.99, 32.83, 32.78, 31.09, 29.32, 28.08, 28.02, 25.56, 25.44. HRMS (ESI) calcd for  $\text{C}_{29}\text{H}_{45}\text{O}_6\text{Br}^{\text{SI}}\text{BrS}$ , ( $[\text{M}+\text{H}]^+$ ) 681.1278, Found 681.1273.

Compound **M3** (yield 64%).  $^1\text{H}$  NMR (500 MHz,  $\text{CDCl}_3$ ),  $\delta$  (ppm) 7.04 (d,  $J = 1.5$  Hz, 1H), 6.89 (d,  $J = 1.5$  Hz, 1H), 6.85 (d,  $J = 1.5$  Hz, 1H), 6.83 (s, 1H), 6.15 (d,  $J = 1.5$  Hz, 1H), 4.14 (m, 2H), 4.04 (m, 2H), 3.98 (m, 2H), 3.85 (m, 2H), 3.83 (m, 2H), 3.74 (m, 4H), 3.70 (m, 2H), 3.66 (m, 2H), 3.64 (m, 4H), 3.40 (m, 2H), 1.91-1.81 (m, 8H), 1.54 (m, 8H).  $^{13}\text{C}$  NMR (126 MHz,  $\text{CDCl}_3$ ),  $\delta$  (ppm) 157.45, 149.26, 149.14, 142.93, 127.80, 118.43, 115.02, 114.07, 111.61, 96.35, 72.04, 70.91, 70.77, 70.68, 69.79, 69.44, 69.20, 69.16, 59.14, 33.87, 32.84, 32.82, 29.22, 29.20, 28.04, 28.02, 25.38, 25.37. HRMS (ESI) calcd for  $\text{C}_{29}\text{H}_{45}\text{O}_6\text{Br}^{\text{SI}}\text{BrS}$ , ( $[\text{M}+\text{H}]^+$ ) 681.1278, Found 681.1271.

The intermediates **M4-M6** were prepared with the similar procedures as follow.

General procedures for **M4-M6**. To a solution of compound **M1-M3** (680 mg, 1.0 mmol) in 60 mL THF at  $-78$  °C under protection gas atmosphere, *n*-BuLi (1.6 M in hexane, 0.69 mL, 1.1 mmol) was added dropwise. After stirring at this temperature for another 1.5 h, tributyltin chloride (340 mg, 1.2

mmol) was added to the solution. Then the reaction was slowly warmed to room temperature and stirred overnight. After that, the mixture was poured into water and extracted twice with ethyl acetate, the combined organic phase was dried with  $\text{MgSO}_4$  and evaporated in vacuo without further purification.

Product **BGM6**, **BGP6** and **BGO6** were prepared with the similar procedures.

General procedures for **BGM6**, **BGP6** and **BGO6**. To a solution of the crude compound **M4-M6** (1.1g, about 1.12 mmol) and BBT-Br (157 mg, 0.45 mmol) in toluene (15 mL) under protection gas atmosphere,  $\text{Pd}(\text{PPh}_3)_2\text{Cl}_2$  (140 mg) was added. The mixture was stirred at 120 °C for 12 h. After cooling to room temperature, the mixture was poured into water and extracted twice with ethyl acetate. The organic phase was dried with  $\text{MgSO}_4$  and evaporated in vacuo. The crude material was purified by silica gel column chromatography (PE/DCM = 4:1) to afford compound **BGM6**, **BGP6** and **BGO6** as dark green solid (yield ~45%).

Compound **BGM6** (yield 43%).  $^1\text{H}$  NMR (500 MHz,  $\text{CDCl}_3$ ),  $\delta$  (ppm) 7.80 (s, 2H), 7.26-7.18 (m, 2H), 6.66 (d,  $J = 1.5$  Hz, 2H), 4.36-4.33 (t,  $J = 6.5$  Hz, 4H), 4.10-4.07 (m, 8H), 3.71-3.68 (m, 4H), 3.57-3.53 (m, 12H), 3.49-3.47 (m, 4H), 3.36-3.32 (m, 14H), 1.93-1.80 (m, 16H), 1.57-1.49 (m, 16H).  $^{13}\text{C}$  NMR (126 MHz,  $\text{CDCl}_3$ ),  $\delta$  (ppm) 157.29, 154.87, 153.08, 137.02, 128.69, 119.63, 114.75, 114.12, 112.83, 105.45, 72.00, 70.88, 70.79, 70.65, 70.61, 70.23, 69.19, 59.12, 33.96, 32.80, 29.22, 28.07, 25.66. HRMS (ESI) calcd for  $\text{C}_{64}\text{H}_{87}\text{O}_{12}\text{N}_4\text{Br}^{81}\text{BrS}_4$ , ( $[\text{M}+\text{H}]^+$ ) 1551.1890, Found 1551.1881.

Compound **BGP6** (yield 47%).  $^1\text{H}$  NMR (500 MHz,  $\text{CDCl}_3$ ),  $\delta$  (ppm) 7.57 (s, 2H), 7.31 (s, 1H), 6.93-6.90 (d,  $J = 1.5$  Hz, 1H), 6.84-6.81 (m, 1H), 4.40-4.38 (t,  $J = 6.5$  Hz, 2H), 4.10-4.07 (m, 2H), 4.01-3.99 (m, 2H), 3.71-3.69 (m, 2H), 3.58-3.53 (m, 6H), 3.49-3.46 (m, 4H), 3.37-3.32 (m, 5H), 1.94-1.82 (m, 8H), 1.57-1.49 (m, 8H).  $^{13}\text{C}$  NMR (126 MHz,  $\text{CDCl}_3$ ),  $\delta$  (ppm) 155.73, 153.21, 152.98, 150.01, 141.44, 123.81, 115.96, 115.21, 114.75, 114.04, 113.94, 72.05, 71.98, 71.05, 70.79, 70.65, 70.61, 70.16, 69.50, 68.61, 59.13, 34.02, 33.95, 32.83, 32.79, 29.38, 28.10, 26.83, 25.68, 25.48. HRMS (ESI) calcd for  $\text{C}_{64}\text{H}_{87}\text{O}_{12}\text{N}_4\text{Br}^{81}\text{BrS}_4$ , ( $[\text{M}+\text{H}]^+$ ) 1551.1890, Found 1551.1884.

Compound **BGO6** (yield 42%).  $^1\text{H}$  NMR (500 MHz,  $\text{CDCl}_3$ ),  $\delta$  (ppm) 7.25 (d,  $J = 1.5$  Hz, 1H), 7.20 (d,  $J = 1.7$  Hz, 1H), 6.92-6.91 (d,  $J = 1.5$  Hz, 1H), 4.41-4.39 (t,  $J = 6.5$  Hz, 2H), 4.10-4.04 (m, 4H), 3.70-3.68 (m, 2H), 3.59-3.56 (m, 2H), 3.53 (m, 2H), 3.51-3.34 (m, 11H), 1.94-1.84 (m, 8H), 1.57 (m, 8H).  $^{13}\text{C}$  NMR (126 MHz,  $\text{CDCl}_3$ ),  $\delta$  (ppm) 156.49, 152.82, 149.59, 149.27, 146.38, 127.53, 118.70, 113.82, 113.78, 113.46, 111.50, 71.96, 71.16, 70.78, 70.64, 70.60, 70.12, 69.28, 69.06, 59.12, 45.14,

33.94, 32.84, 32.82, 29.25, 29.20, 28.06, 28.04, 25.41, 25.39. HRMS (ESI) calcd for  $C_{64}H_{87}O_{12}N_4Br^{81}BrS_4$ , ( $[M+H]^+$ ) 1551.1890, Found 1551.1919.

Product **BGM6P**, **BGP6P** and **BGO6P** were prepared with the similar procedures as follow.

General procedures for **BGM6P**, **BGP6P** and **BGO6P**. **BGM6**, **BGP6** or **BGO6** (84 mg, 0.054 mmol) and sodium azide (50 mg, 0.75 mmol) were dissolved in DMF (10 mL), and the mixture was stirred for 3 h at room temperature. Then a large amount of water was added until all solids were dissolved. The reaction was extracted twice with ethyl acetate, the combined organic phase was dried with  $MgSO_4$  and evaporated in vacuum. The crude product was subjected to flash column chromatography on silica gel to afford a dark green solid (69 mg, 0.052mmol). The dark green solid was dissolved in THF (5 mL) and copper (I) thiophene-2-carboxylate (CuTc) (5 mg), w-alkynyl-PEG-hydroxyl PEG1500 ( $M_n$  = 1500 mg/mL) (150 mg, about 0.1 mol) and tris[(1-benzyl-1H-1,2,3-triazol-4-yl)methyl]amine (TBTA) (3 mg) were added. The system was stirred at room temperature for 0.5 h, and then filtered with diatomite, and the solution was evaporated in vacuum. The crude product was purified by thin layer chromatography twice. First, ethyl acetate was used as an eluent and a small amount of impurities would move to the top of the TLC plate, but other parts of product remained at the start point of the TLC plate. Then DCM/MeOH (10:1-5:1) was used as an eluent successively, and the PEGylated product could be separated from alkyne-PEG (yiled ~85%).

**BGM6P** (yield 86%). SEC measured:  $M_n$  = 7191 g/mol,  $M_w$  = 7676 g/mol, PDI = 1.067.

**BGP6P** (yield 83%). SEC measured:  $M_n$  = 7523 g/mol,  $M_w$  = 8006 g/mol, PDI = 1.064.

**BGO6P** (yield 89%). SEC measured:  $M_n$  = 7486 g/mol,  $M_w$  = 7953 g/mol, PDI = 1.063.

### 3 Supplementary Figures and Tables

#### 3.1 Supplementary Figures

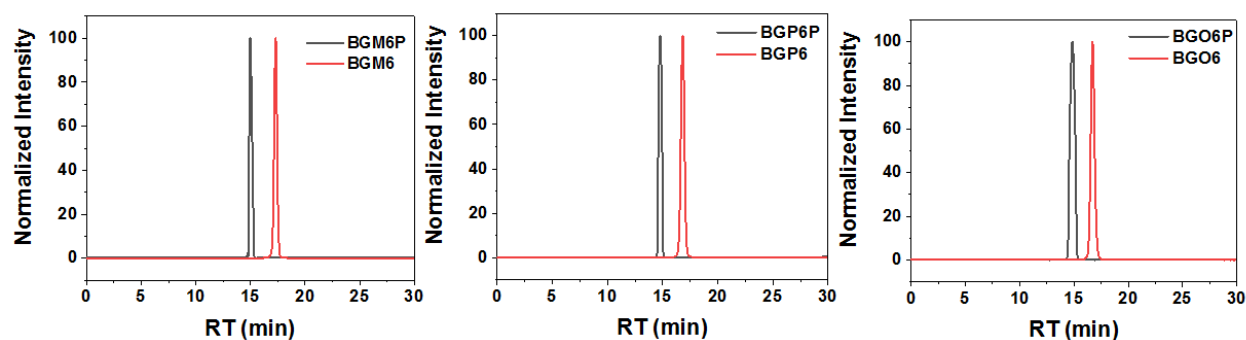

**Supplementary Figure 1.** Size-exclusion chromatography (SEC) analysis of the un-PEGylated and PEGylated molecular fluorophores.

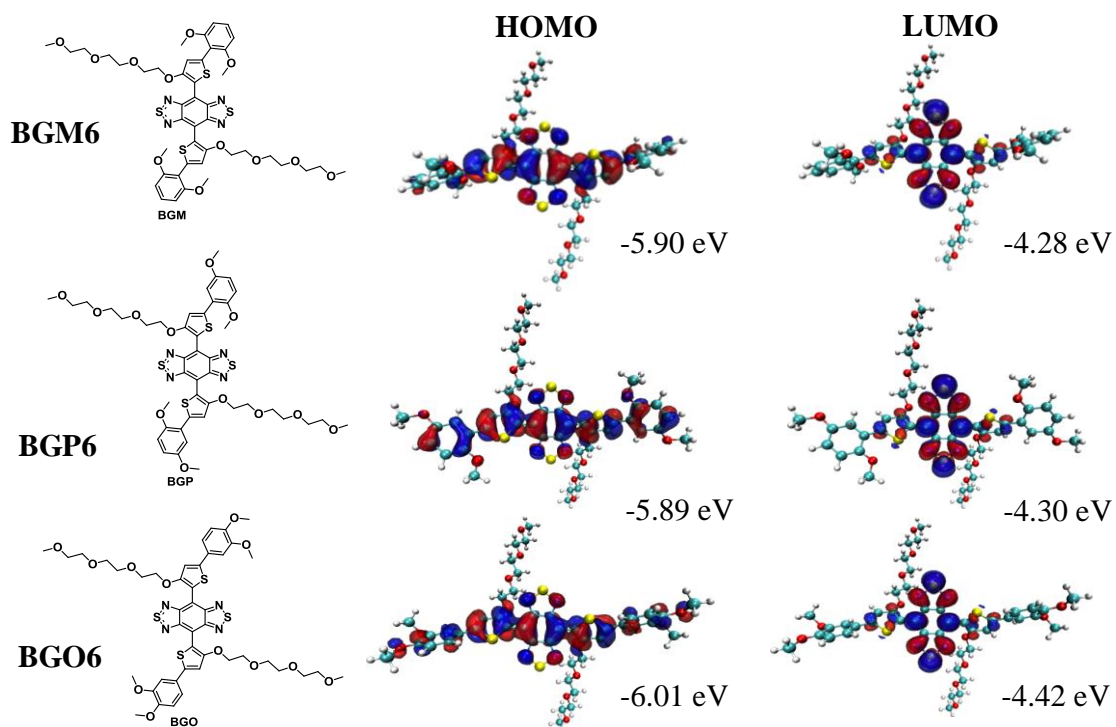

**Supplementary Figure 2.** Calculated HOMOs and LUMOs of the molecular fluorophores at the tuned- $\omega$ B97XD\*/6-31G(d) level. The HOMO and LUMO energy levels are also presented in the figures. To reduce the computational requirements, side chains on the benzene units are replaced by methoxy groups. Note that the LUMO levels are obtained by subtracting the optical gap from the HOMO levels.

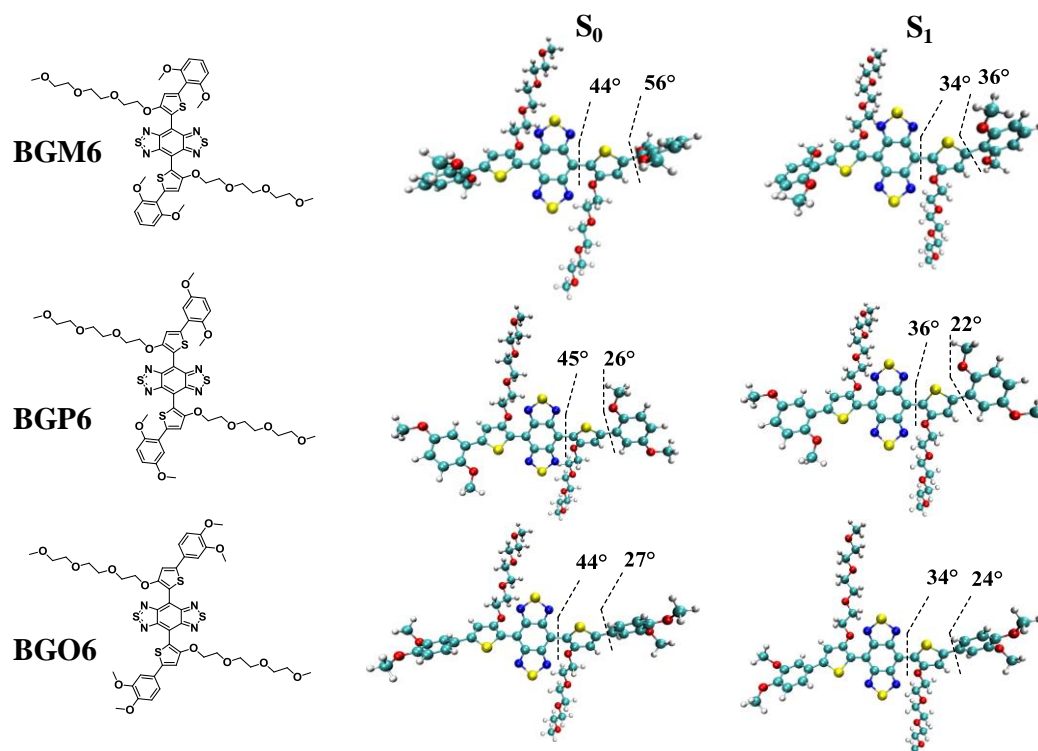

**Supplementary Figure 3.** Optimized ground-state ( $S_0$ ) and first singlet excited state ( $S_1$ ) geometries of the molecular fluorophores at the optimally tuned  $\omega$ B97XD\*/6-31G(d) level. To reduce the computational requirements, side chains on the fluorene units are replaced by methyloxy groups. The dihedral angles are shown.

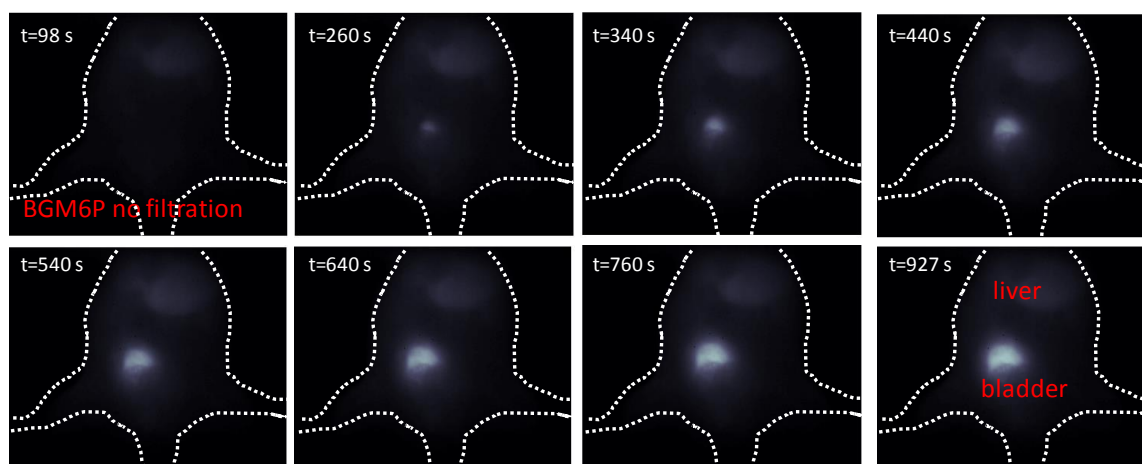



**Supplementary Figure 4.** Selected time points from video-rate NIR-II imaging of a mouse in the supine position after tail vein injection of as-prepared **BGM6P** (Inject dose: OD=2, 200 uL, 50 ms exposure time).

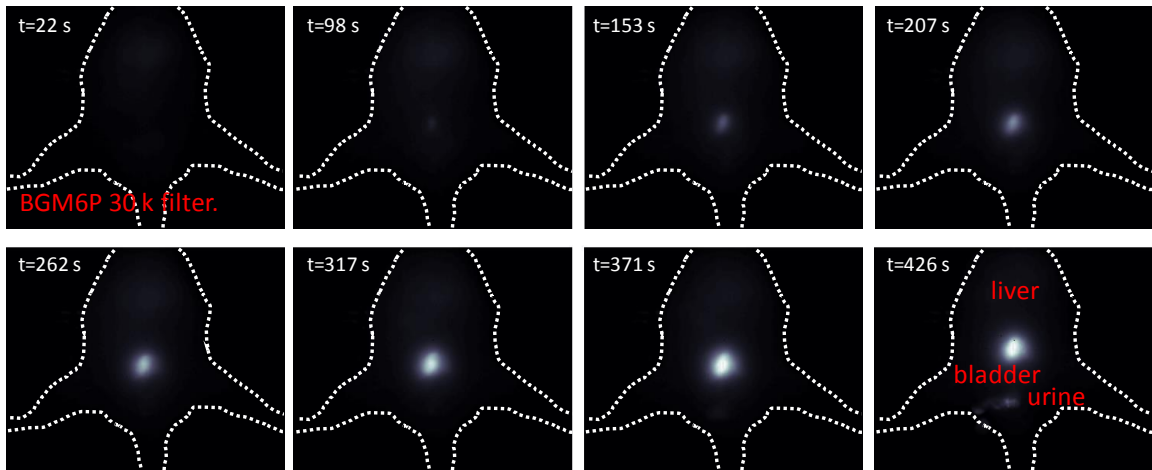

**Supplementary Figure 5.** Selected time points from video-rate NIR-II imaging of a mouse in the supine position after tail vein injection of 30 K filtered **BGM6P**.

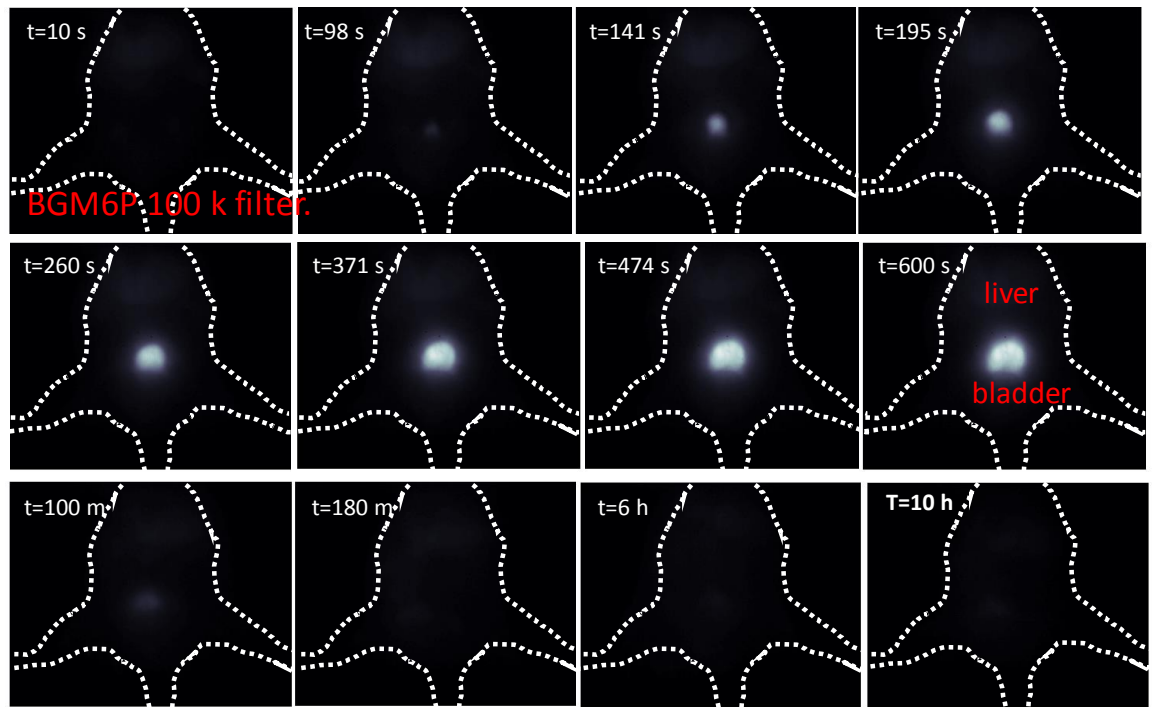

**Supplementary Figure 6.** Selected time points from video-rate NIR-II imaging of a mouse in the supine position after tail vein injection of 100 K filtered **BGM6P**.

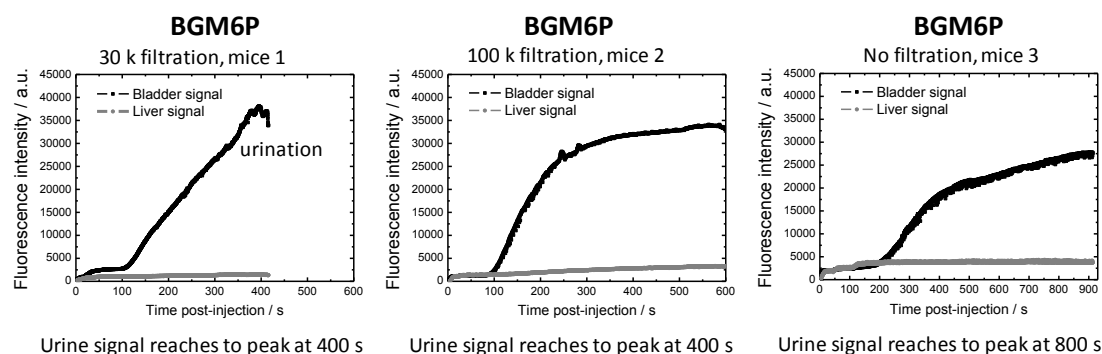

**Supplementary Figure 7.** Bladder and liver signal of the mouse with an injection of 30 K filtered, 100 K filtered and as-prepared **BGM6P**. Liver signal is *ca.* 1000, 2500, 3500 counts, respectively.

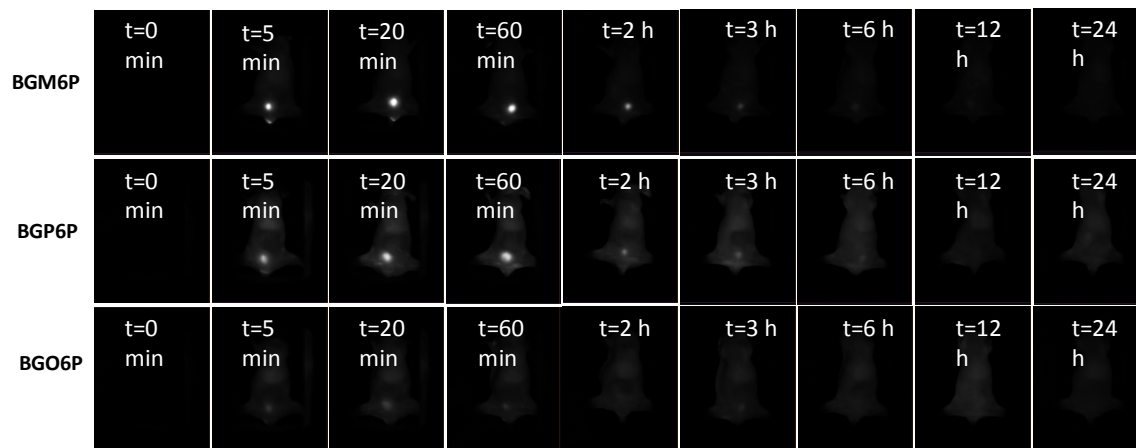

**Supplementary Figure 8.** Selected time points from NIR-II whole body imaging of mice in the supine position after tail vein injection of 30 K filtrated **BGM6P**, **BGP6P** and **BGO6P**, respectively.

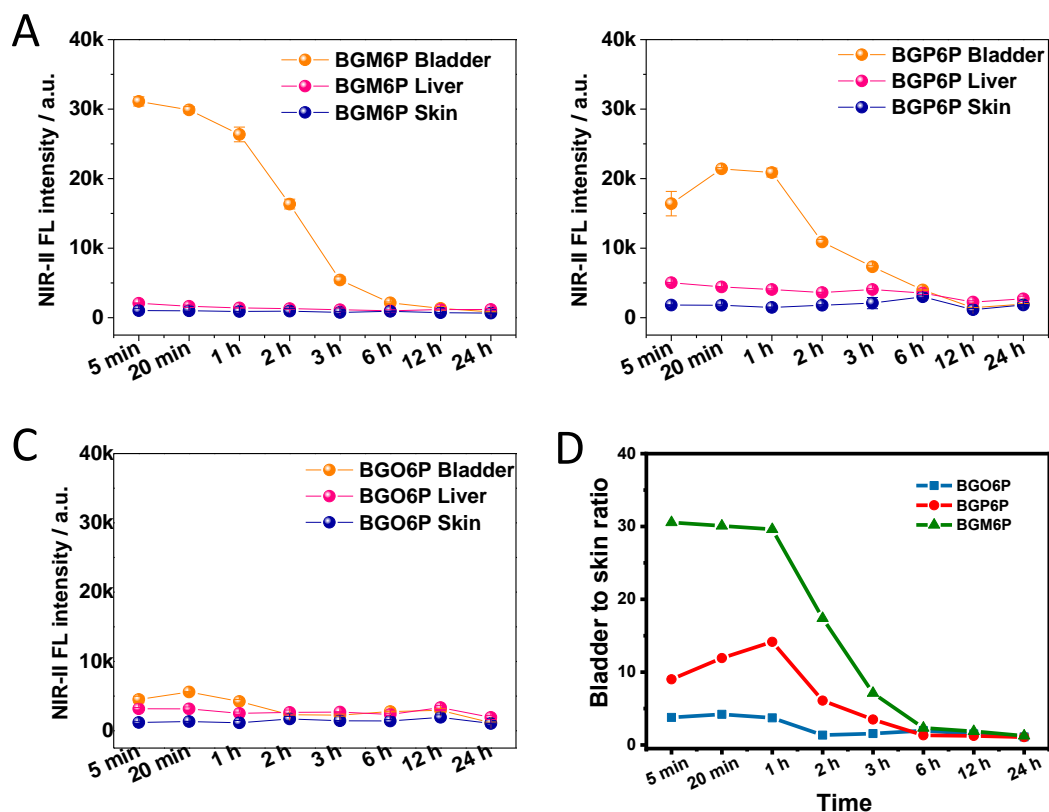

**Supplementary Figure 9.** NIR-II fluorescent signal intensity of liver (A), bladder (B) and skin (C) regions for **BGO6P**, **BGP6P** and **BGM6P** injected mouse at different time after injection. (D) Representative background subtracted signal of bladder to skin as a function of time for mice injected with **BGM6P**, **BGP6P** and **BGO6P**, respectively.

Chemical structure of 2,2'-(1,3-phenylene)-5,5'-bis(4-bromophenyl) ether:

BrC1=CC=C(C=C1)Oc2cc3ccccc3cc2Oc4cc(Br)ccc4

<sup>13</sup>C NMR spectrum (CDCl<sub>3</sub>) showing peaks at the following chemical shifts (ppm):

- 157.35
- 156.11
- 133.25
- 128.65
- 121.22
- 113.07
- 105.46
- 97.85
- 72.08
- 70.91
- 70.81
- 70.72
- 69.94
- 69.30
- 68.98
- 59.18
- 33.99
- 32.80
- 29.07
- 27.94
- 25.46

12

Positive:

14 #17 RT: 0.16 AV: 1 NL: 4.35E9  
T: FTMS + p ESI Full ms [200.0000-1000.0000]

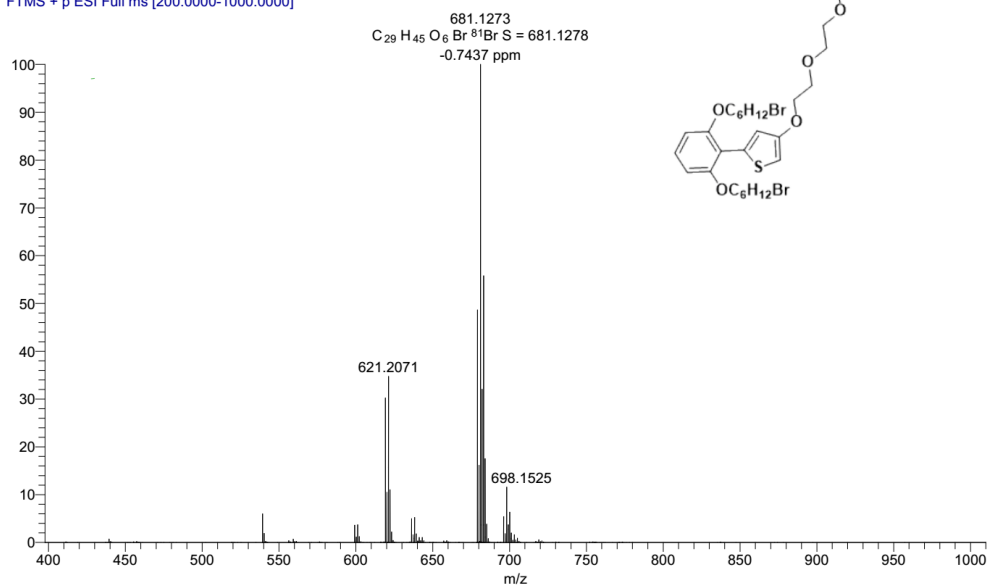

[M+H]

14 #17 RT: 0.16 AV: 1 NL: 4.35E9  
T: FTMS + p ESI Full ms [200.0000-1000.0000]

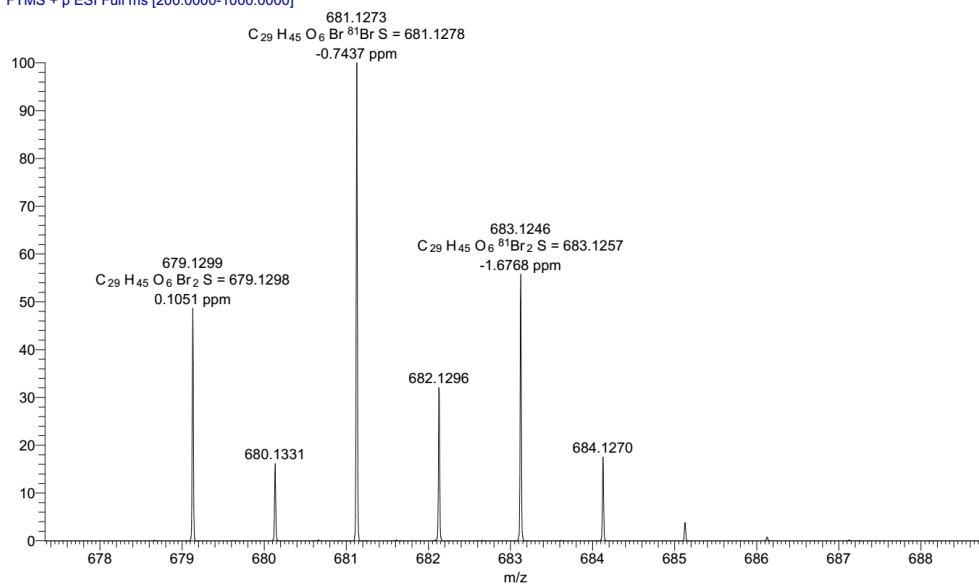

**Supplementary Figure 12. HR MASS spectrum of M1.**

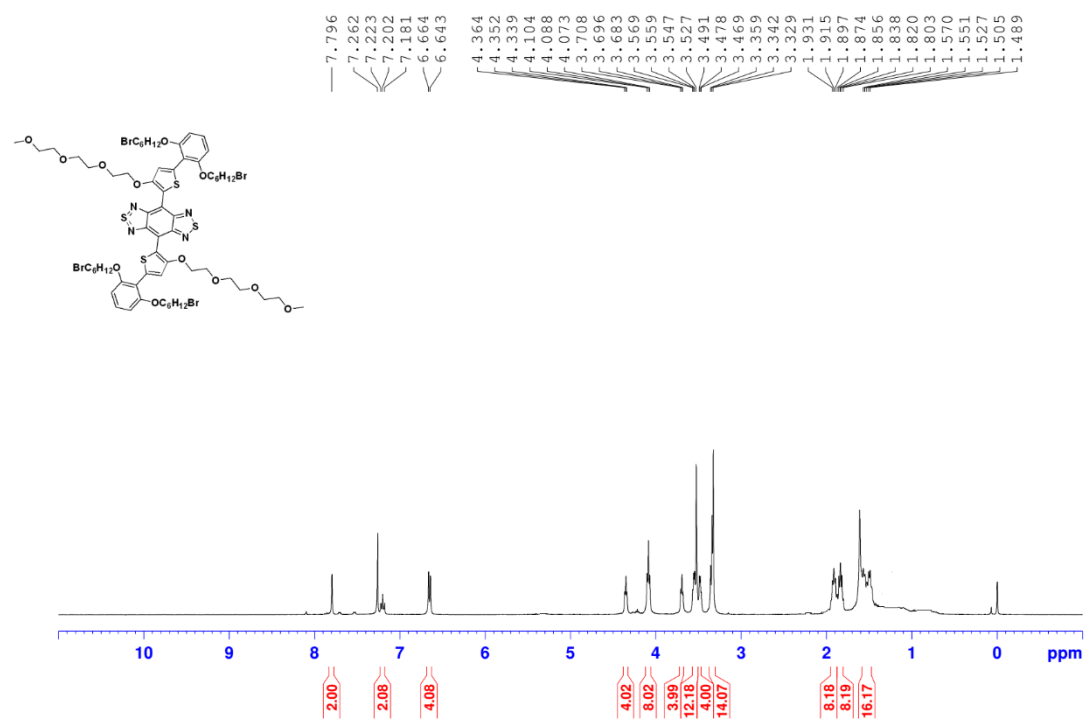Supplementary Figure 13.  $^1\text{H}$  NMR spectrum of BGM6.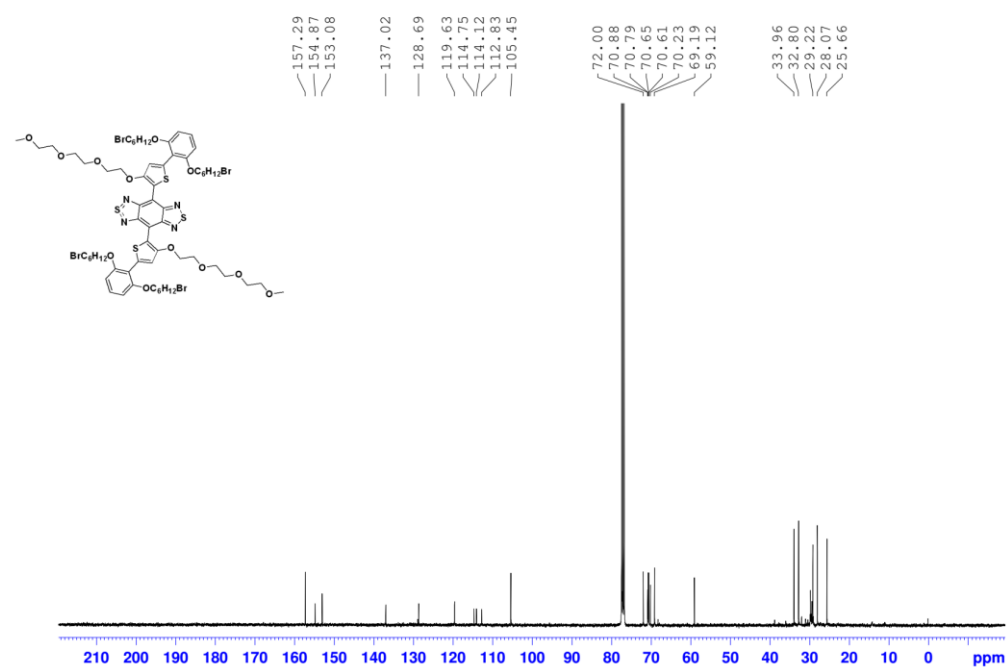Supplementary Figure 14.  $^{13}\text{C}$  NMR spectrum of BGM6.

LM3-Br-d2\_170425174628 #7 RT: 0.08 AV: 1 NL: 2.26E7  
T: FTMS +p ESI Full ms [1000.0000-2500.0000]

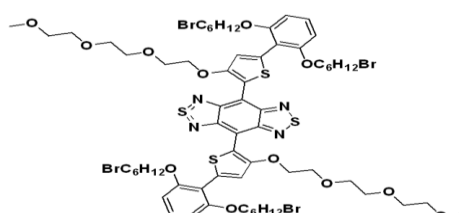

LM3-Br-d2\_170425174628 #7 RT: 0.08 AV: 1 NL: 2.26E7  
T: FTMS + p ESI Full ms [1000.0000-2500.0000]

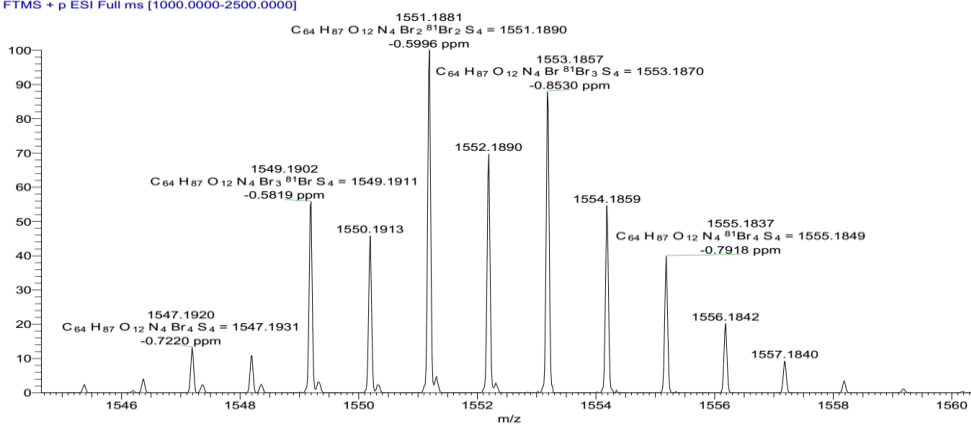

**Supplementary Figure 15.** HR MASS spectrum of **BGM6**.

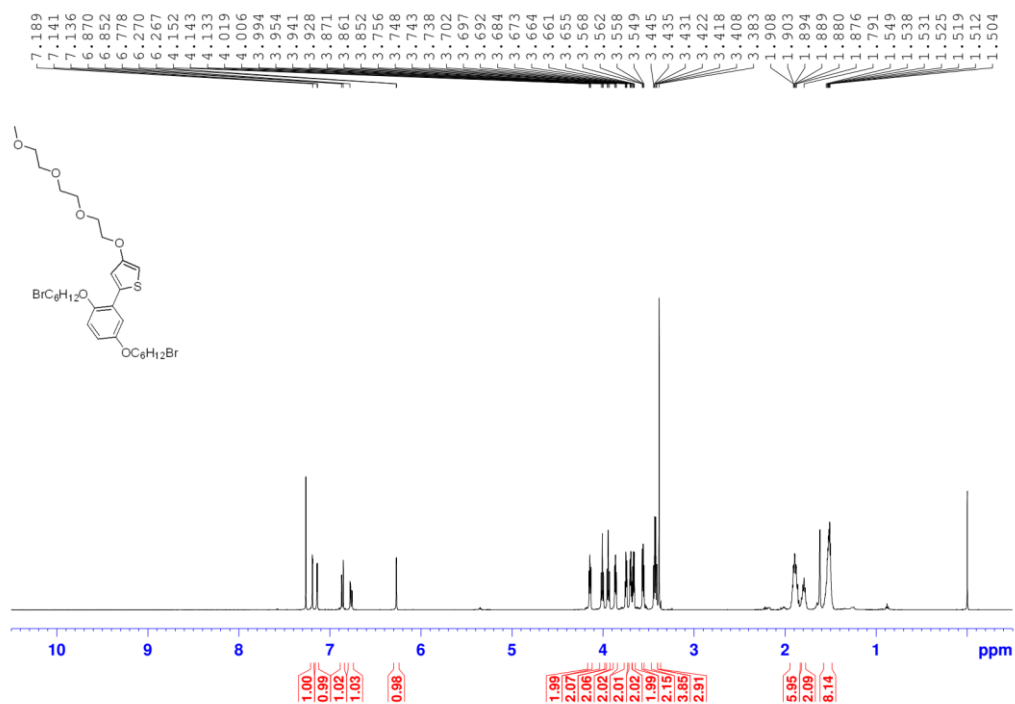Supplementary Figure 16. <sup>1</sup>H NMR spectrum of M2.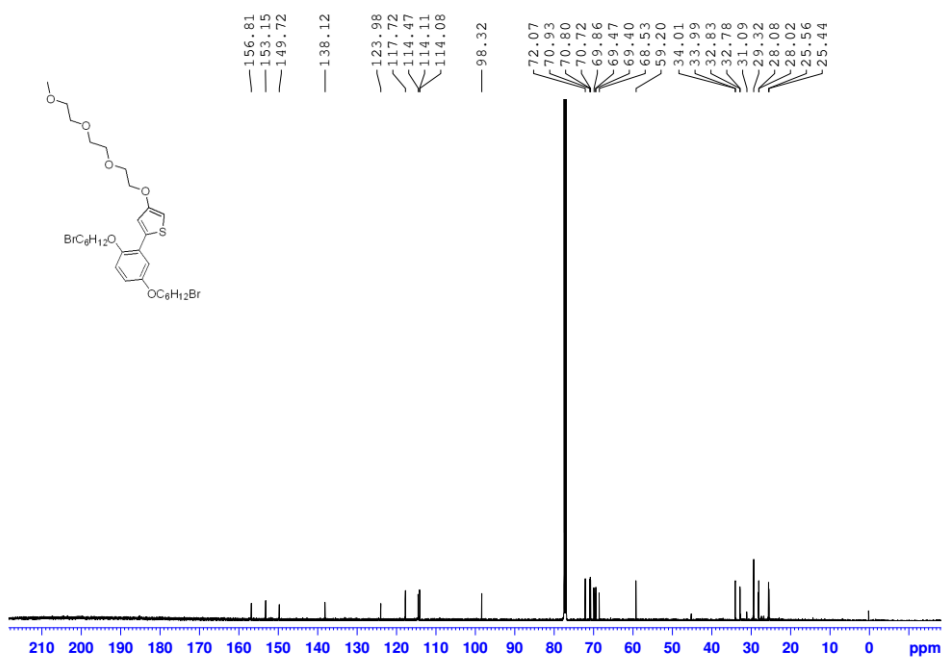Supplementary Figure 17. <sup>13</sup>C NMR spectrum of M2.



PBTG-2 #13-20 RT: 0.15-0.21 AV: 4 NL: 3.55E8  
T: FTMS + p ESI Full ms [400.0000-1000.0000]

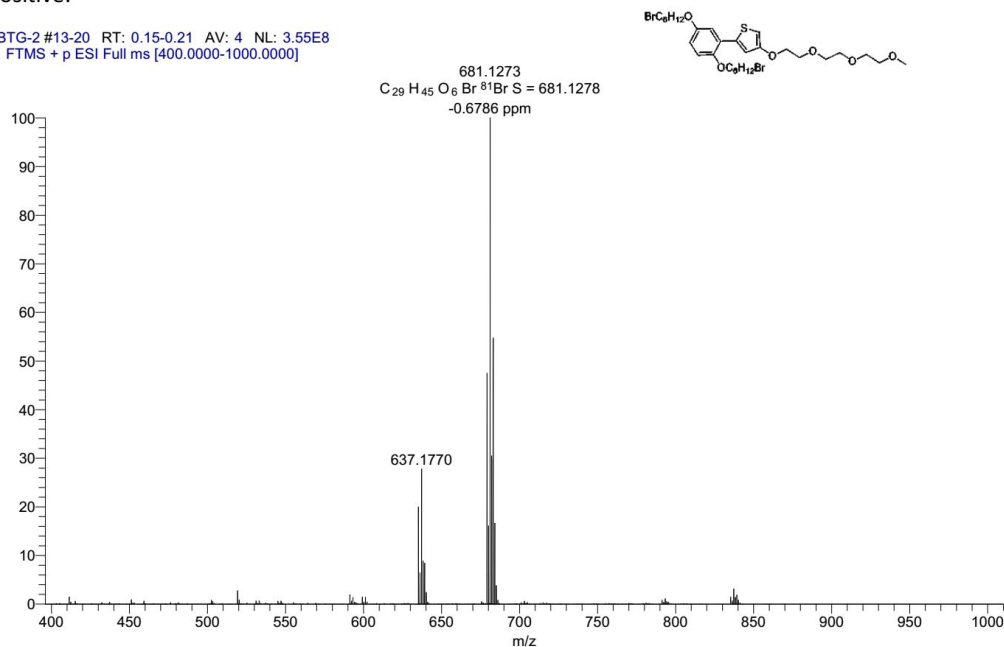

PBTG-2 #13-20 RT: 0.15-0.21 AV: 4 NL: 3.55E8  
T: FTMS + p ESI Full ms [400.0000-1000.0000]

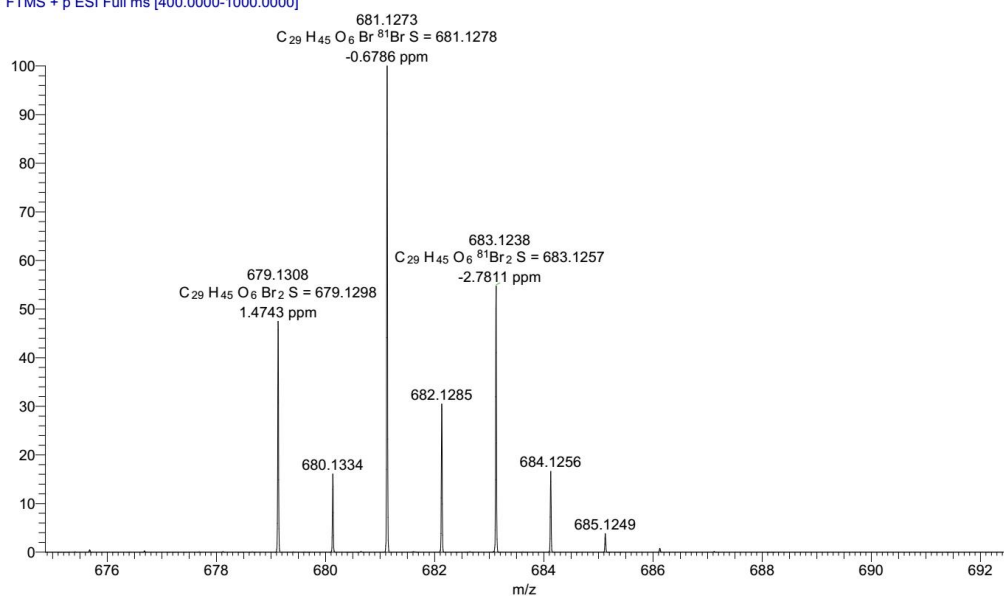

**Supplementary Figure 18.** HR MASS spectrum of M2.

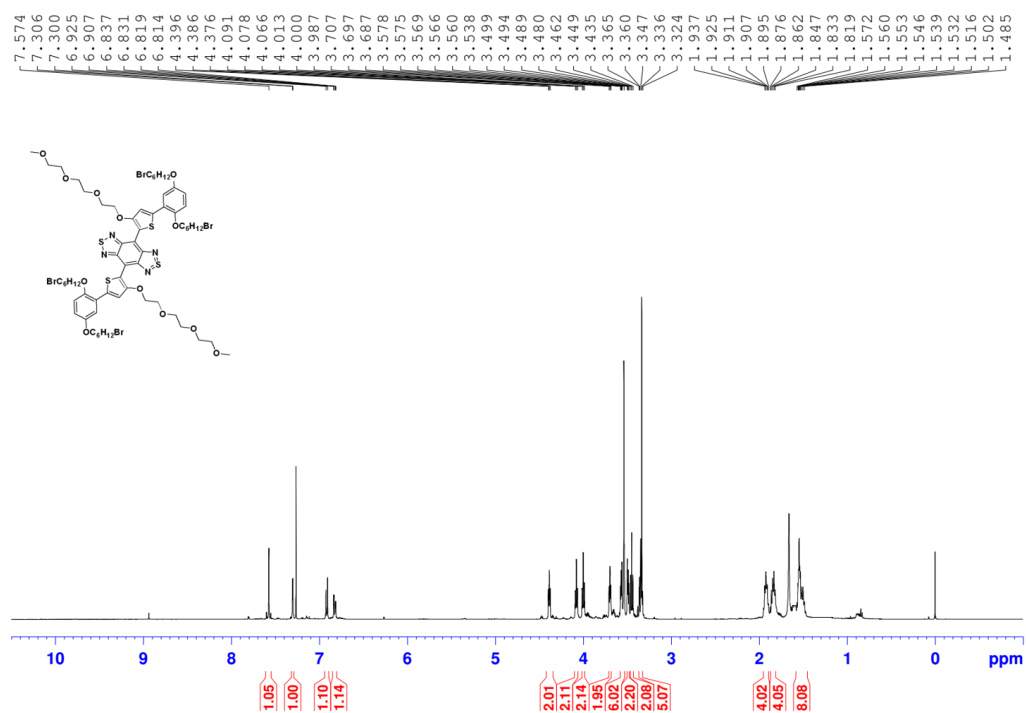Supplementary Figure 19.  $^1\text{H}$  NMR spectrum of BGP6.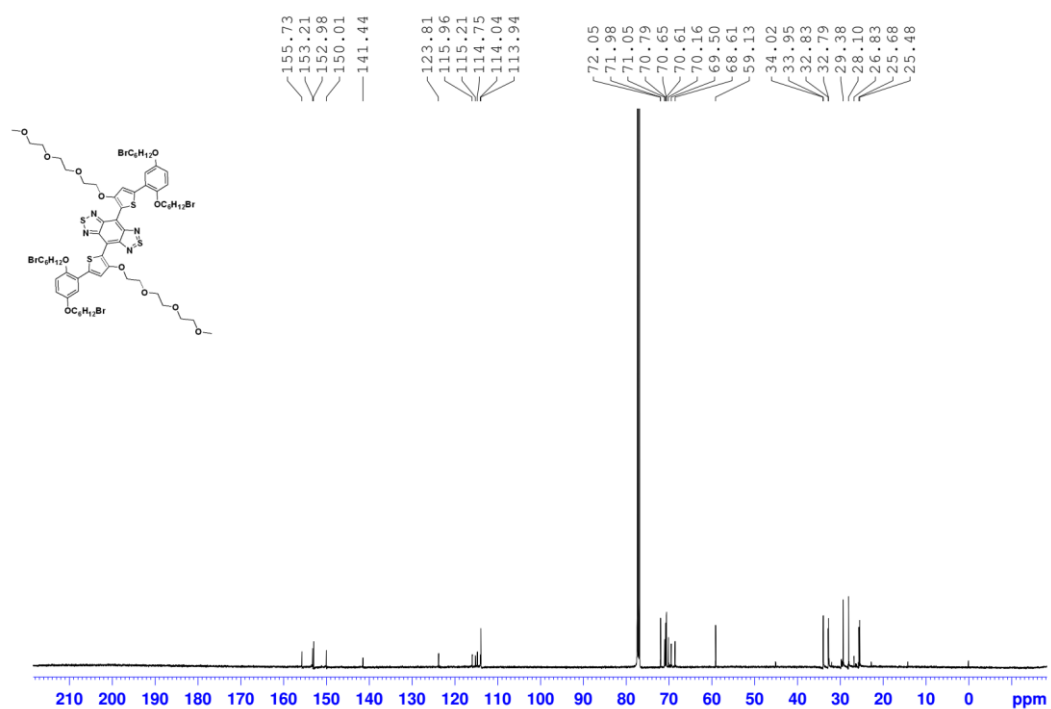Supplementary Figure 20.  $^{13}\text{C}$  NMR spectrum of BGP6.

Positive:

LM3-P-Br-d2\_170731154508 #34 RT: 0.43 AV: 1 NL: 1.91E6  
T: FTMS + p ESI Full ms [1000.0000-2000.0000]

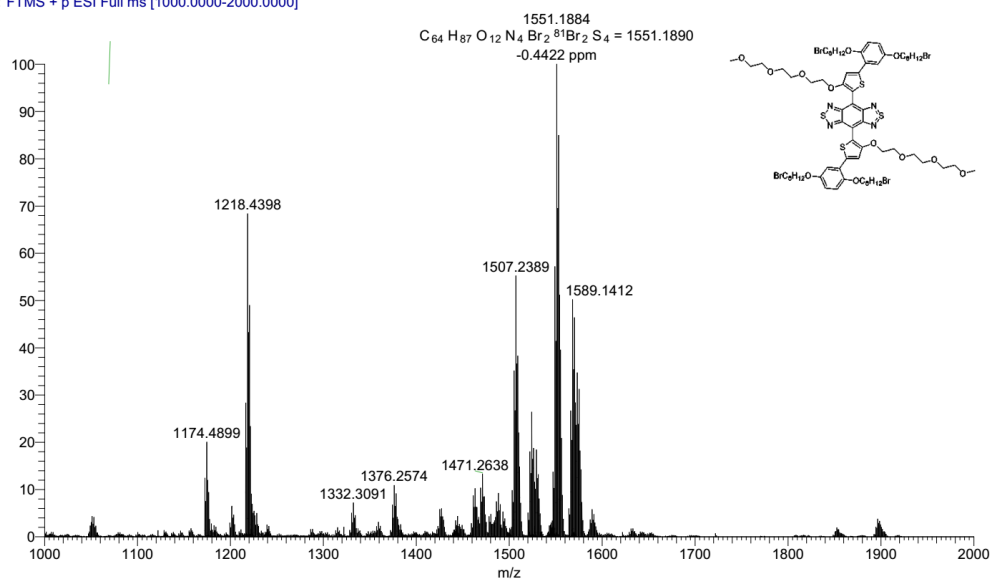

[M+H]

LM3-P-Br-d2\_170731154508 #34 RT: 0.43 AV: 1 NL: 1.91E6  
T: FTMS + p ESI Full ms [1000.0000-2000.0000]

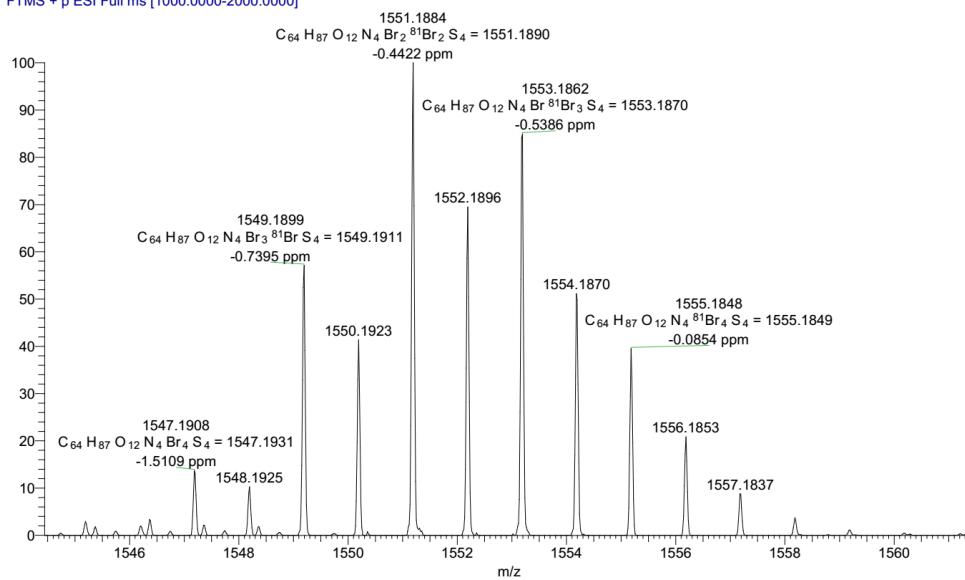

Supplementary Figure 21. HR MASS spectrum of BGP6.

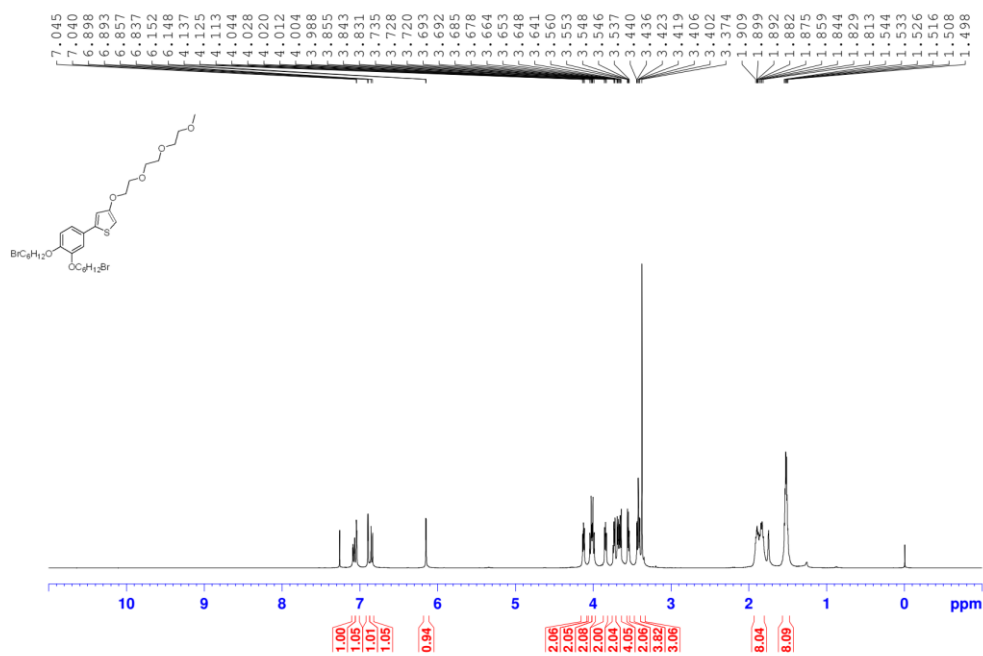

**Supplementary Figure 22.**  $^1\text{H}$  NMR spectrum of M3.

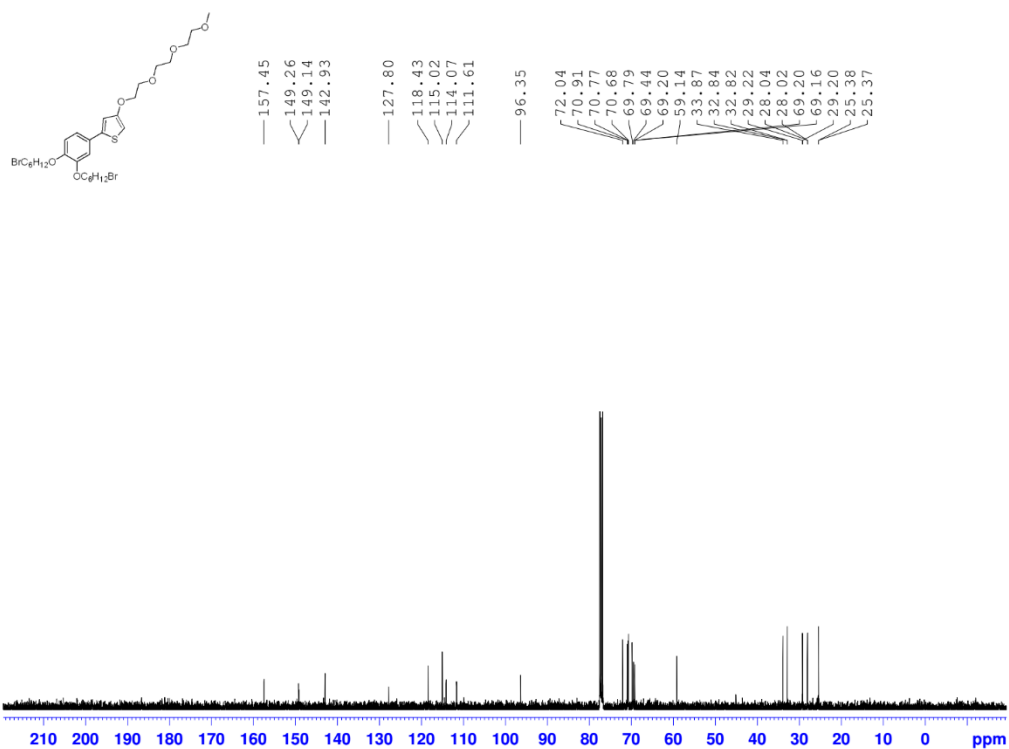

**Supplementary Figure 23.**  $^{13}\text{C}$  NMR spectrum of M3.

OBTG-2 #13-23 RT: 0.15-0.22 AV: 5 NL: 3.69E8  
T: FTMS + p ESI Full ms [400.0000-1000.0000]

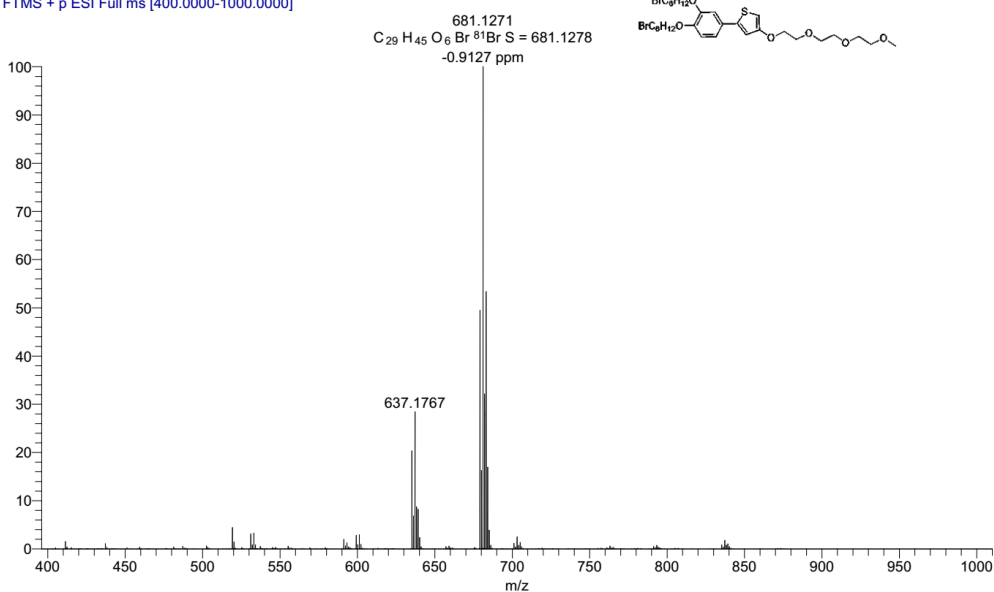

OBTG-2 #13-23 RT: 0.15-0.22 AV: 5 NL: 3.69E8  
T: FTMS + p ESI Full ms [400.0000-1000.0000]

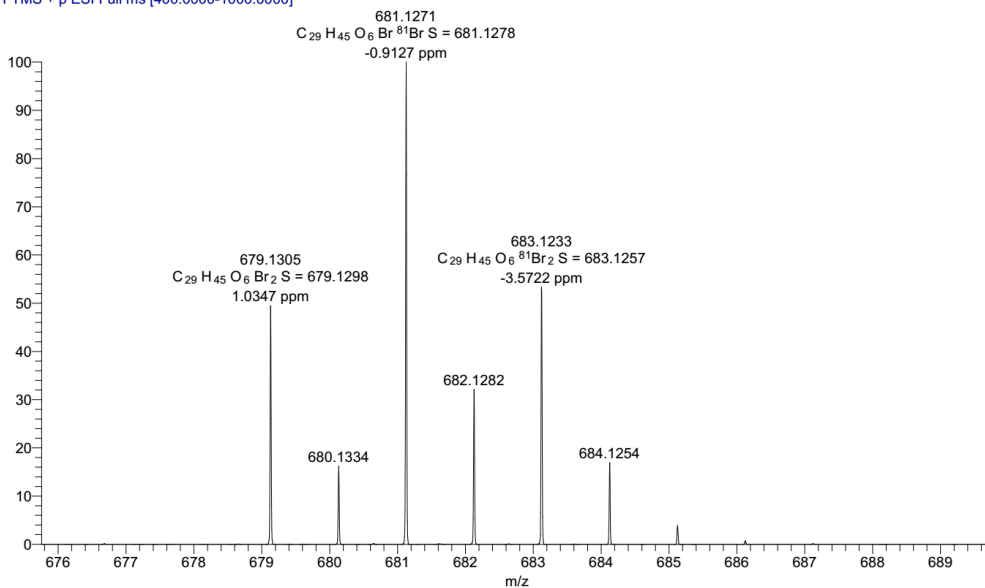

21

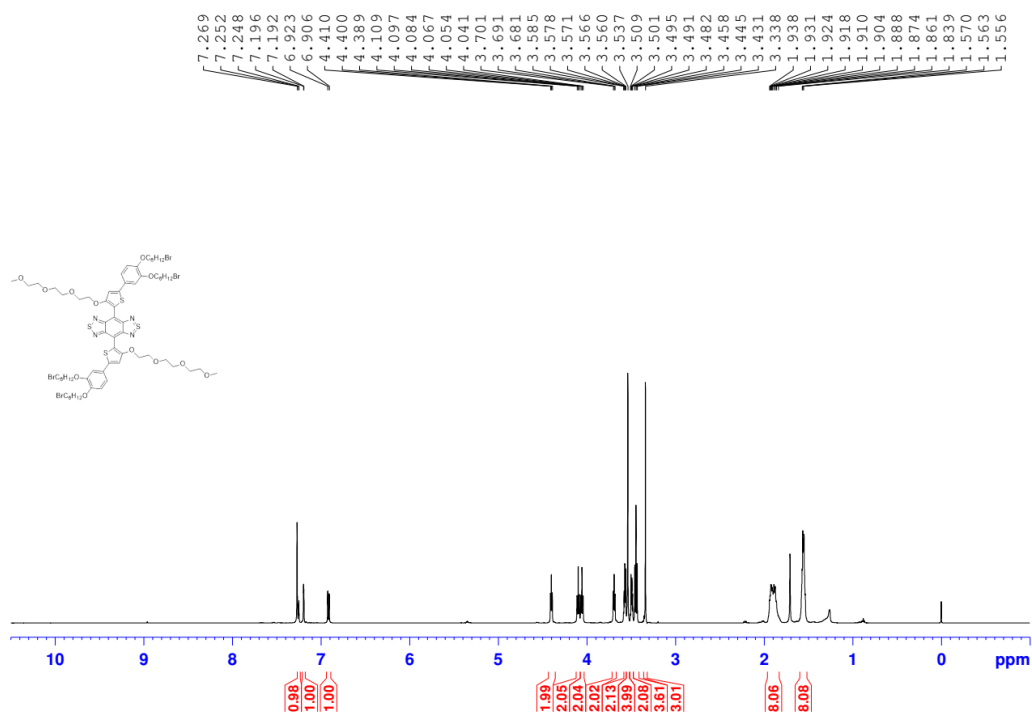Supplementary Figure 25. <sup>1</sup>H NMR spectrum of BGO6.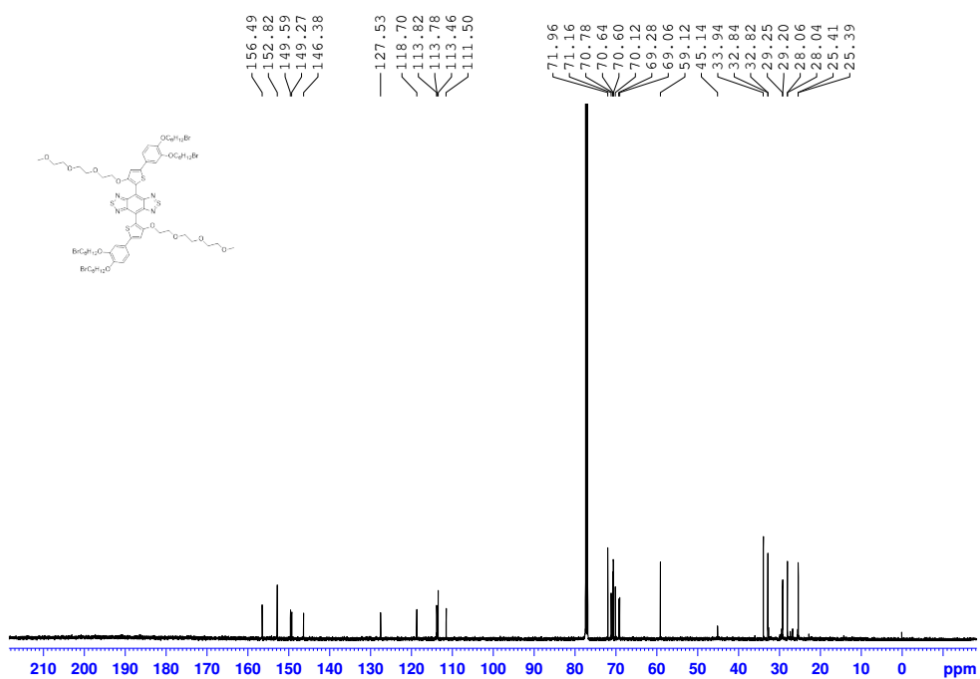Supplementary Figure 26. <sup>13</sup>C NMR spectrum of BGO6.

Positive:

LM3-O-Br\_170822172050 #23 RT: 0.29 AV: 1 NL: 8.43E6  
T: FTMS + p ESI Full ms [1200.0000-2000.0000]

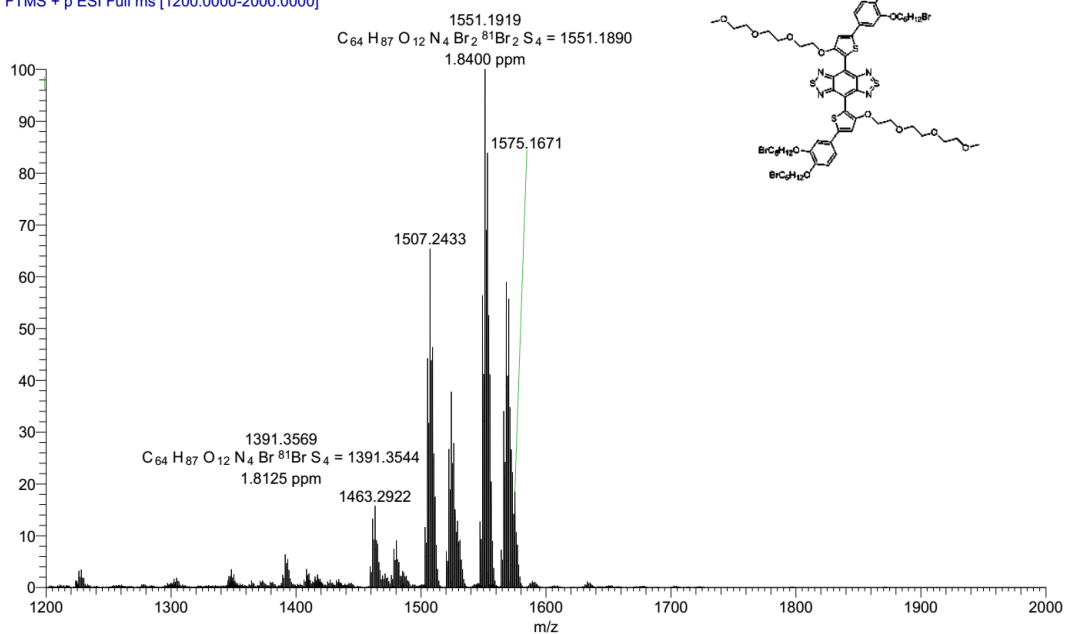

[M+H]

LM3-O-Br\_170822172050 #23 RT: 0.29 AV: 1 NL: 8.43E6  
T: FTMS + p ESI Full ms [1200.0000-2000.0000]

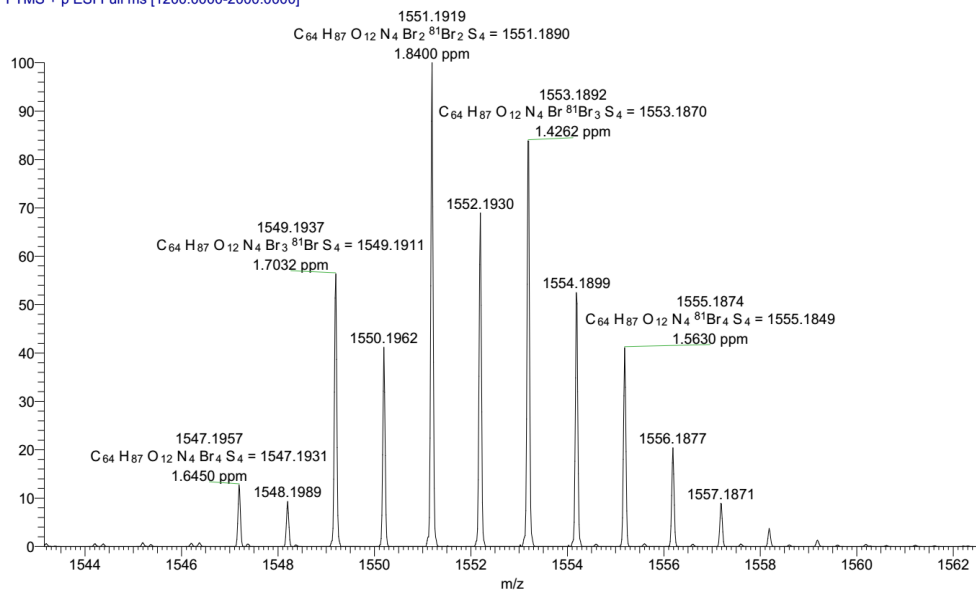

Supplementary Figure 27. HR MASS spectrum of BGO6.

**Supplementary Table 1.** Calculated first vertical  $S_0$ - $S_1$  excitation energies ( $E_{01}$ ), first vertical  $S_1$ - $S_0$  emission energies ( $E_{10}$ ), electronic configurations determined at the TD- $\omega$ B97XD\*/6-31G (d) level of theory. <sup>a</sup>The optimally tuned range-separated parameters included in the functionals. <sup>ex</sup>Experimental data.

| Molecules | $\omega^*$ <sup>a</sup> | $E_{01}$ ( $\lambda_{01}$ )<br>ev (nm) | $f_{01}$ | Electronic<br>configuration    | $E_{10}$ ( $\lambda_{10}$ )<br>ev (nm) | $f_{10}$ | $\lambda_{01}^{\text{ex}}$<br>(nm) | $\lambda_{10}^{\text{ex}}$<br>(nm) |
|-----------|-------------------------|----------------------------------------|----------|--------------------------------|----------------------------------------|----------|------------------------------------|------------------------------------|
| BGM6      | 0.1182                  | 1.62(764)                              | 0.32     | HOMO $\rightarrow$<br>LUMO 99% | 1.14(1092)                             | 0.32     | 736                                | 1047                               |
| BGP6      | 0.1182                  | 1.59(780)                              | 0.39     | HOMO $\rightarrow$<br>LUMO 98% | 1.13(1094)                             | 0.36     | 736                                | 1060                               |
| BGO6      | 0.1187                  | 1.59(781)                              | 0.39     | HOMO $\rightarrow$<br>LUMO 98% | 1.13(1093)                             | 0.36     | 741                                | 1060                               |

**Supplementary Table 2.** Size-exclusion chromatography (SEC) analysis of the NIR-II molecular fluorophores.

| Fluorophores | RV (mL) | $M_n$ (Daltons) | $M_w$ (Daltons) | $M_w/M_n$ |
|--------------|---------|-----------------|-----------------|-----------|
| BGM6P        | 14.97   | 7191            | 7676            | 1.067     |
| BGP6P        | 14.78   | 7523            | 8006            | 1.064     |
| BGO6P        | 14.85   | 7486            | 7953            | 1.063     |



**Supplementary Table 3.** Pass percentage analysis of the fluorophores with different filters.

|       | Filtration      | OD at peak | Pass percentage (%) |
|-------|-----------------|------------|---------------------|
| BGM6P | No filtration   | 3.91       | 100.00              |
|       | 100k filtration | 3.64       | 93.10               |
|       | 50k filtration  | 0.98       | 25.10               |
|       | 30k filtration  | 0.04       | 1.08                |
| BGP6P | No filtration   | 3.83       | 100.00              |
|       | 100k filtration | 3.23       | 84.33               |
|       | 50k filtration  | 0.36       | 9.40                |
|       | 30k filtration  | 0.00       | 0.00                |
| BGO6P | No filtration   | 3.77       | 100.00              |
|       | 100k filtration | 2.32       | 61.53               |
|       | 50k filtration  | 0.14       | 3.66                |
|       | 30k filtration  | 0.00       | 0.00                |

#### 4 Reference

- Bayly, C.I., Cieplak, P., Cornell, W., and Kollman, P.A. (1993). A well-behaved electrostatic potential based method using charge restraints for deriving atomic charges: the RESP model. *The Journal of Physical Chemistry* 97, 10269-10280. doi: 10.1021/j100142a004
- Heyd, J., Scuseria, G.E., and Ernzerhof, M. (2003). Hybrid functionals based on a screened Coulomb potential. *Journal of Chemical Physics* 118, 8207. doi: 10.1063/1.1564060

- Jorgensen, W.L., Chandrasekhar, J., Madura, J.D., Impey, R.W., and Klein, M.L. (1983). Comparison of simple potential functions for simulating liquid water. *The Journal of Chemical Physics* 79, 926-935. doi: 10.1063/1.445869
- Lee, C., Yang, W., and Parr, R.G. (1988). Development of the Colle-Salvetti correlation-energy formula into a functional of the electron density. *Phys Rev B Condens Matter* 37, 785-789. doi: 10.1103/physrevb.37.785
- Ma, H., Liu, C., Hu, Z., Yu, P., Zhu, X., Ma, R., Sun, Z., Zhang, C.-H., Sun, H., Zhu, S., and Liang, Y. (2020). Propylenedioxy Thiophene Donor to Achieve NIR-II Molecular Fluorophores with Enhanced Brightness. *Chemistry of Materials* 32, 2061-2069. doi: 10.1021/acs.chemmater.9b05159
- Runge, E., and Gross, E.K.U. (1984). Density-Functional Theory for Time-Dependent Systems. *Physical Review Letters* 52, 997-1000. doi: 10.1103/PhysRevLett.52.997
- Ryckaert, J.-P., Ciccotti, G., and Berendsen, H.J.C. (1977). Numerical integration of the cartesian equations of motion of a system with constraints: molecular dynamics of n-alkanes. *Journal of Computational Physics* 23, 327-341. doi: [https://doi.org/10.1016/0021-9991\(77\)90098-5](https://doi.org/10.1016/0021-9991(77)90098-5)
- Tomasi, J., Mennucci, B., and Cammi, R. (2005). Quantum Mechanical Continuum Solvation Models. *Chemical Reviews* 105, 2999-3094. doi: 10.1021/cr9904009
- Wan, H., Ma, H., Zhu, S., Wang, F., Tian, Y., Ma, R., Yang, Q., Hu, Z., Zhu, T., Wang, W., Ma, Z., Zhang, M., Zhong, Y., Sun, H., Liang, Y., and Dai, H. (2018). Developing a Bright NIR-II Fluorophore with Fast Renal Excretion and Its Application in Molecular Imaging of Immune Checkpoint PD-L1. *Advanced Functional Materials* 28, 1804956. doi: <https://doi.org/10.1002/adfm.201804956>
- Wang, J., Wolf, R.M., Caldwell, J.W., Kollman, P.A., and Case, D.A. (2004). Development and testing of a general amber force field. *Journal of Computational Chemistry* 25, 1157-1174. doi: <https://doi.org/10.1002/jcc.20035>
- Yang, Q., Hu, Z., Zhu, S., Ma, R., Ma, H., Ma, Z., Wan, H., Zhu, T., Jiang, Z., Liu, W., Jiao, L., Sun, H., Liang, Y., and Dai, H. (2018). Donor Engineering for NIR-II Molecular Fluorophores with Enhanced Fluorescent Performance. *Journal of the American Chemical Society* 140, 1715-1724. doi: 10.1021/jacs.7b10334
- Yang, Q., Ma, Z., Wang, H., Zhou, B., Zhu, S., Zhong, Y., Wang, J., Wan, H., Antaris, A., Ma, R., Zhang, X., Yang, J., Zhang, X., Sun, H., Liu, W., Liang, Y., and Dai, H. (2017). Rational Design of Molecular Fluorophores for Biological Imaging in the NIR-II Window. *Advanced Materials* 29, 1605497. doi: <https://doi.org/10.1002/adma.201605497>
